# Supplementary material
Source: publisher figshare collection journal article supplement (https://gsajournals.figshare.com/ndownloader/files/16409666)
Supplement: Supplementary file 1 [file 16409666]

## SUPPLEMENTARY INFORMATION

### **Destabilization of the Tumor-Inducing Plasmid from an Octopine-Type *Agrobacterium tumefaciens* Lineage Drives a Large Deletion in the Co-Resident At Megaplasmid**

Ian S. Barton<sup>a</sup>, Thomas G. Platt<sup>b</sup>, Douglas B. Rusch<sup>c</sup> and Clay Fuqua<sup>a\*</sup>

<sup>a</sup>Department of Biology  
Indiana University  
Bloomington, Indiana, USA

<sup>b</sup>Division of Biology  
Kansas State University  
Manhattan, KS 66506

<sup>c</sup>Center for Genomics and Bioinformatics  
Indiana University  
Bloomington, IN 47405

Running Head: Megaplasmid deletion in *Agrobacterium*

\*Address for correspondence: Clay Fuqua, Dept. Biol., 1001 E. 3rd St., Jordan Hall 142, Indiana Univ., Bloomington, IN 47405-1847. Tel: 812-856-6005, FAX: 812-855-6705,  
E-mail: [cfuqua@indiana.edu](mailto:cfuqua@indiana.edu)

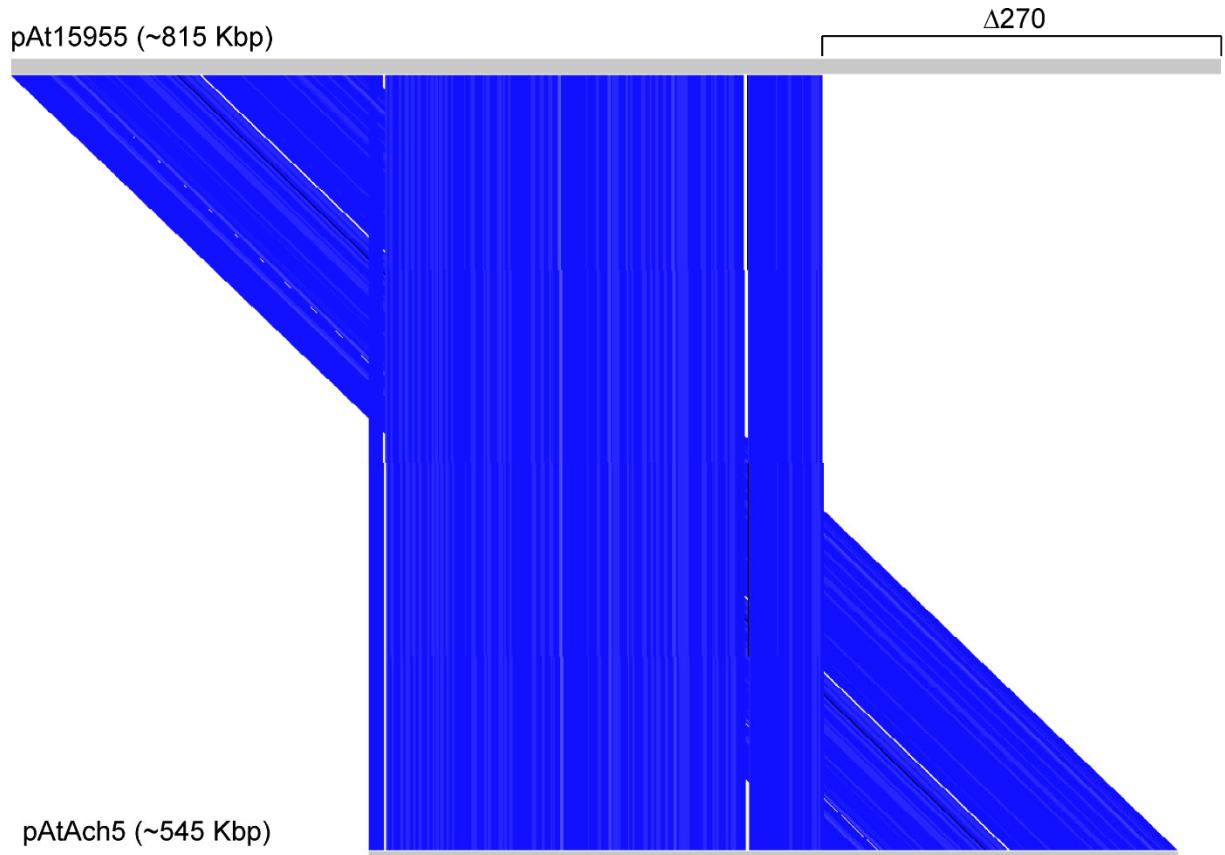

**Figure S1: Analogous At plasmid deletion present in natural isolate, *A. tumefaciens* Ach5.** Modified Artemis Comparison Tool (ACT) visualization of TBLASTX alignment between At plasmid sequences of *A. tumefaciens* 15955 and *A. tumefaciens* Ach5 indicates deletion in the *A. tumefaciens* Ach5 At plasmid (pAtAch5) at the precise location of the observed deletion in pAt15955. Gray bar depicts plasmid sequence. Blue connecting lines indicate stretches of homology >70% identity. Bracket indicates ~270 Kbp deletion segment.

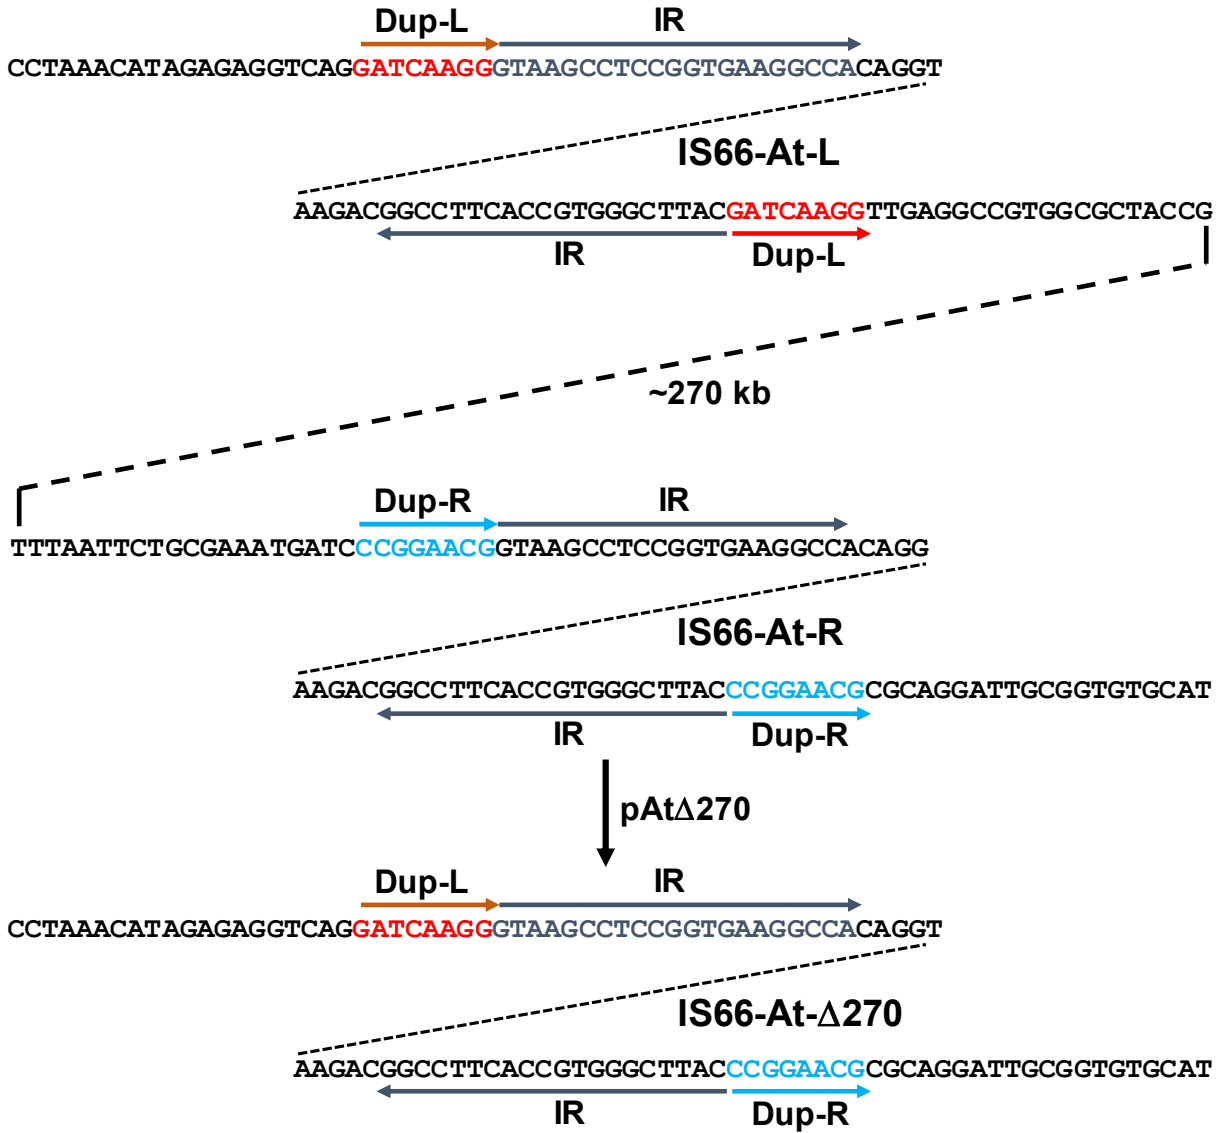

**Figure S2. Flanking sequences from pAt15955 IS66 elements.** IS66\_At\_L and IS66\_At\_R flank an ~270kb segment of the At plasmid which is deleted upon pTi15955 plasmid curing. Light blue and red arrows labeled as Dup indicate the 8 bp duplication generated by IS66 insertion and arrows labeled IR indicate the inverted repeats that define the end of each IS66 element.

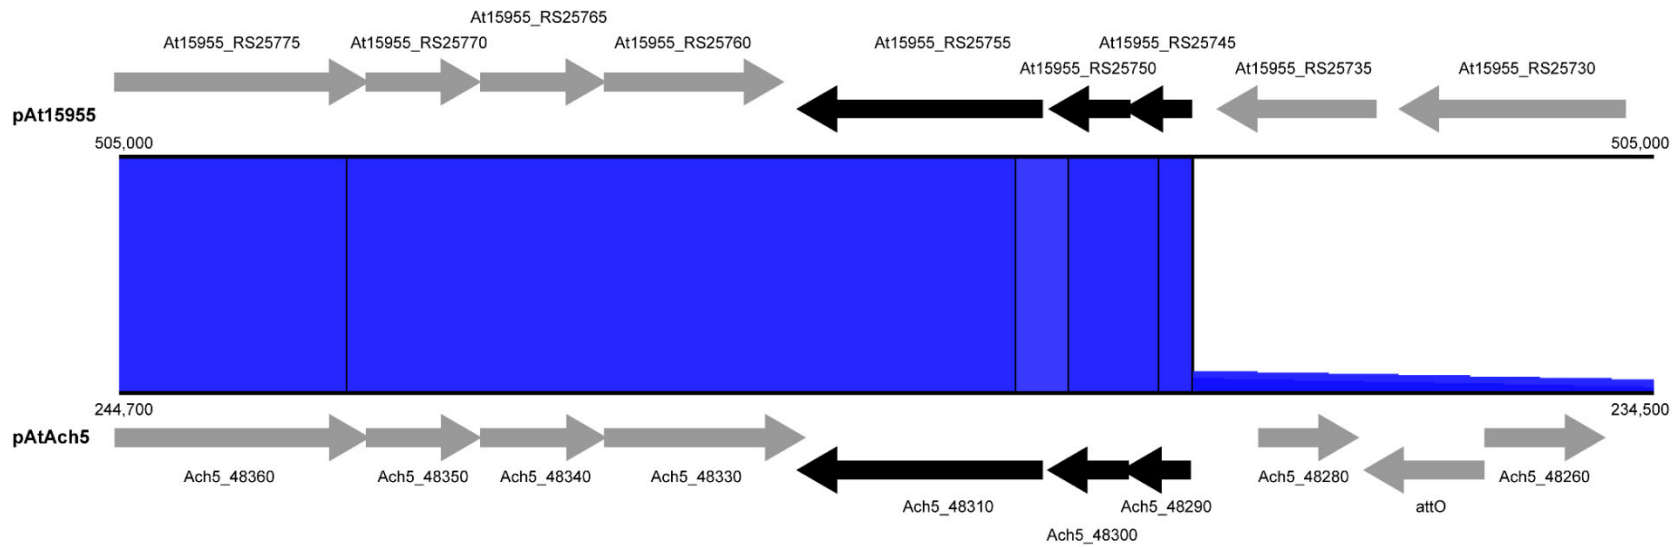

**Figure S3: IS-element occurs at site of deletion in *A. tumefaciens* 15955 and *A. tumefaciens* Ach5.** Modified ACT visualization of TBLASTX alignment between pAt15955 and pAtAch5 at deletion site identifies homologous IS-element at junction. Shown is alignment of junction site in pAtAch5 with one side of deletion interval in pAt15955 that still carries the  $\Delta 270$  segment. Blue connecting lines indicate stretches of >90% identity

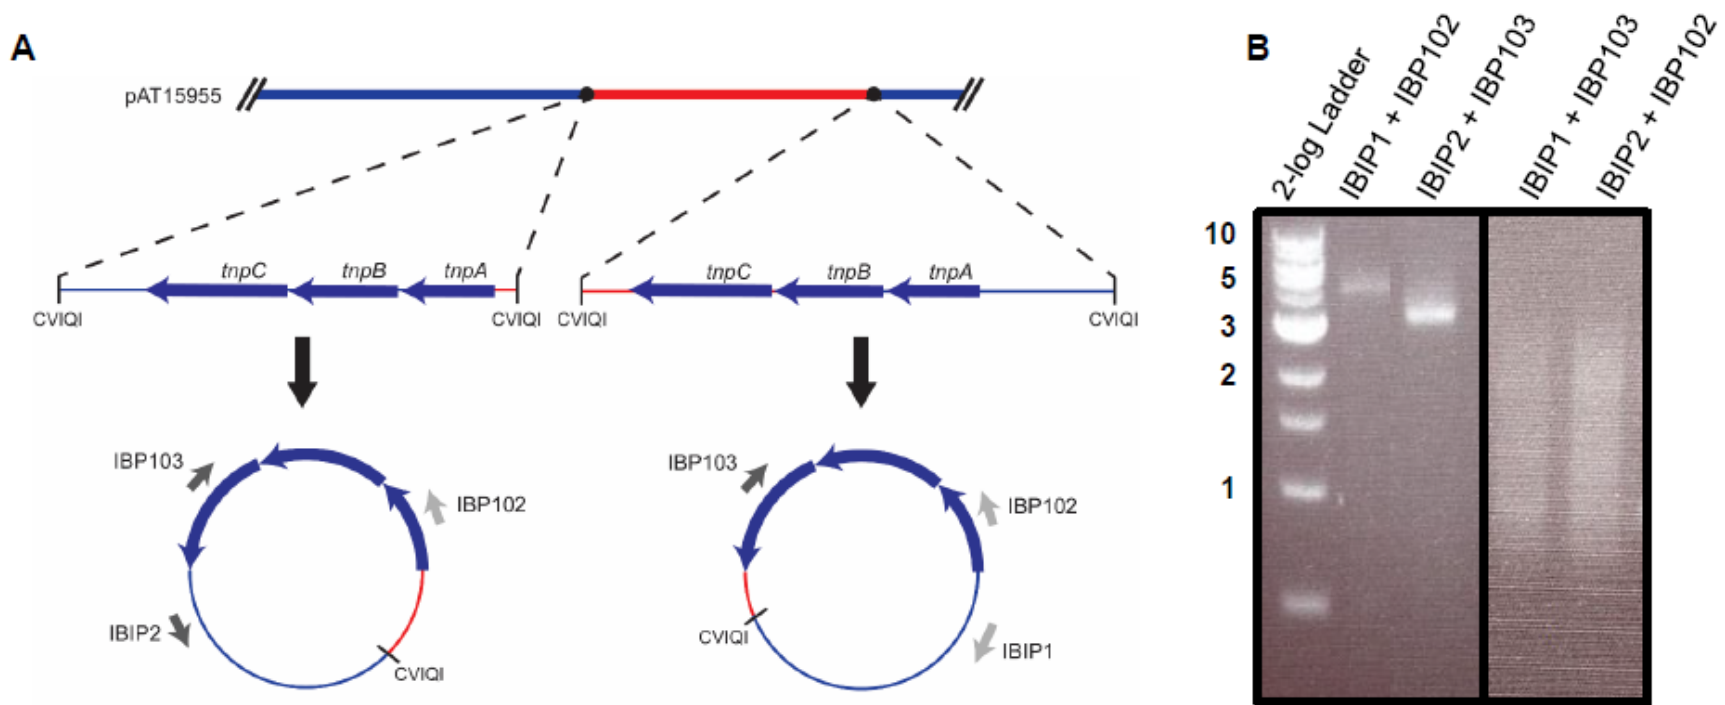

**Figure S4: Inverse PCR approach confirms IS66 elements flank pAt15955 segment in a direct orientation.** A) Schematic depicting inverse PCR design. gDNA from WT *A. tumefaciens* 15955 was digested with the restriction enzyme, CVQI, and subsequently ligated with T4 ligase. PCR analysis was then conducted on ligation products with sets of primers specific for either the IS66 element or flanking regions. Black circles or blue arrows represent IS66 elements. Red or blue lines indicate sequence within or without pAt15955 deletion segment, respectively. Larger, black arrows represent ligation step. Smaller, gray arrows represent PCR primers. Hash marks at end of replicon indicate continuation of sequence. Hashed lines indicate zoomed in depiction of region. B) Inverse PCR reactions performed on ligation products as depicted in A. Primer pairs used in each reaction are indicated. Ladder sizes shown in Kbp.

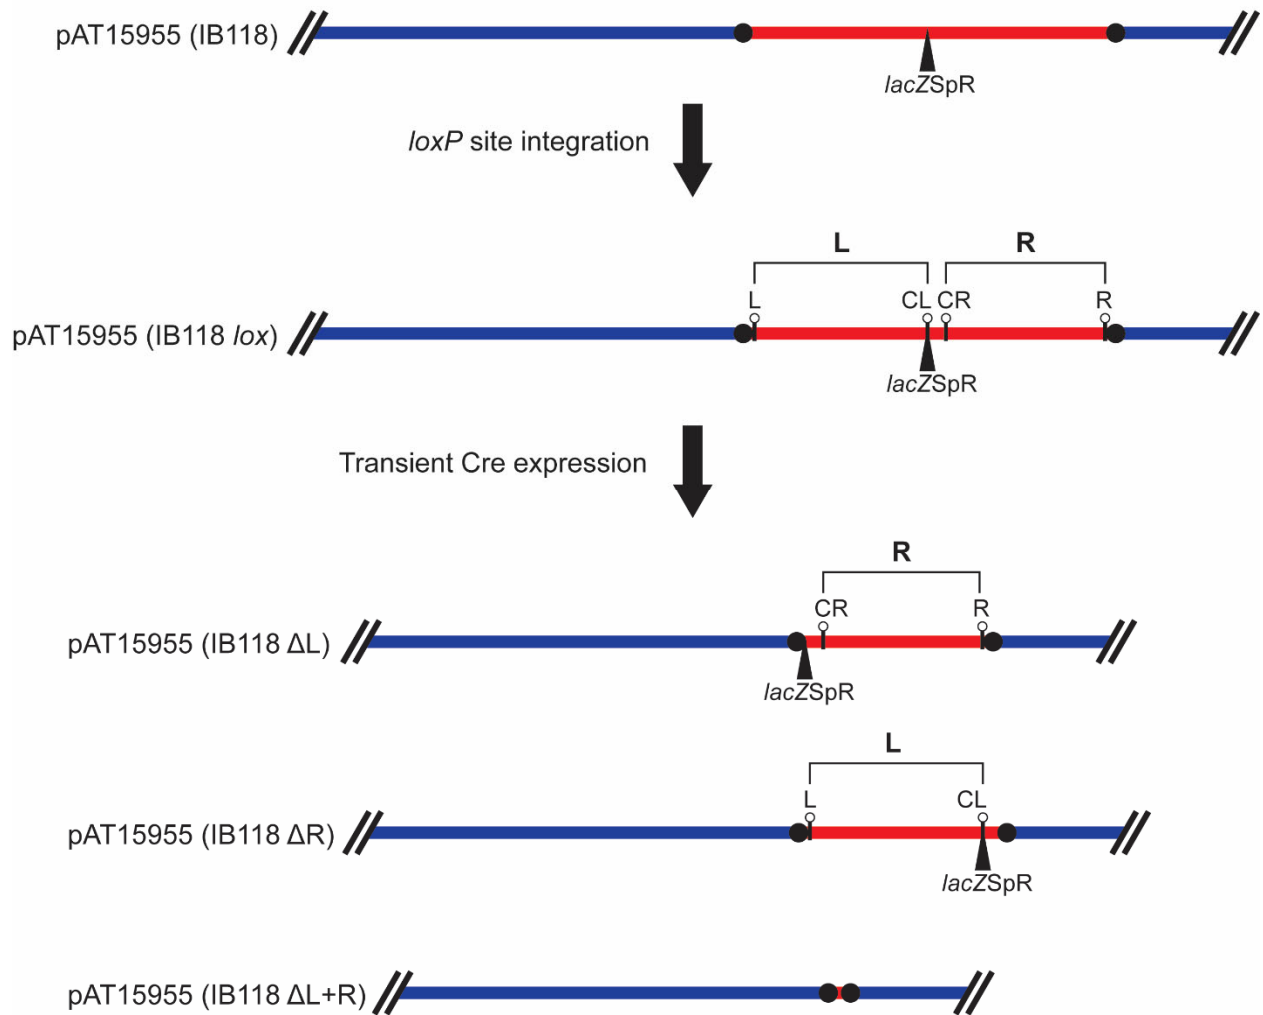

**Figure S5: Schematic depicting Cre/lox approach for pAt15955 segment truncation.**

Cre/lox was utilized to truncated the pAt15955 segment within the reporter strain IB118. *loxP* sites were introduced sequentially into four locations within pAt15955 (denoted L, CL, CR, and R). All four sites are shown here (IB118 *lox*), but only two *loxP* sites were introduced in combination into three independent strains (see Methods, Table S1) to generate three variants upon transient Cre expression (IB118  $\Delta$ L, IB118  $\Delta$ R, and IB118  $\Delta$ L+R) that have been truncated for either the left (L) or right (R) half, or entire pAt15955 segment. Red or blue lines represent pAt15955 sequences within or without the pAt15955 deletion segment, respectively. Black circles indicate IS66 elements. *lacZSp<sup>R</sup>* marker position is shown. Positions of *loxP* integration sites are shown

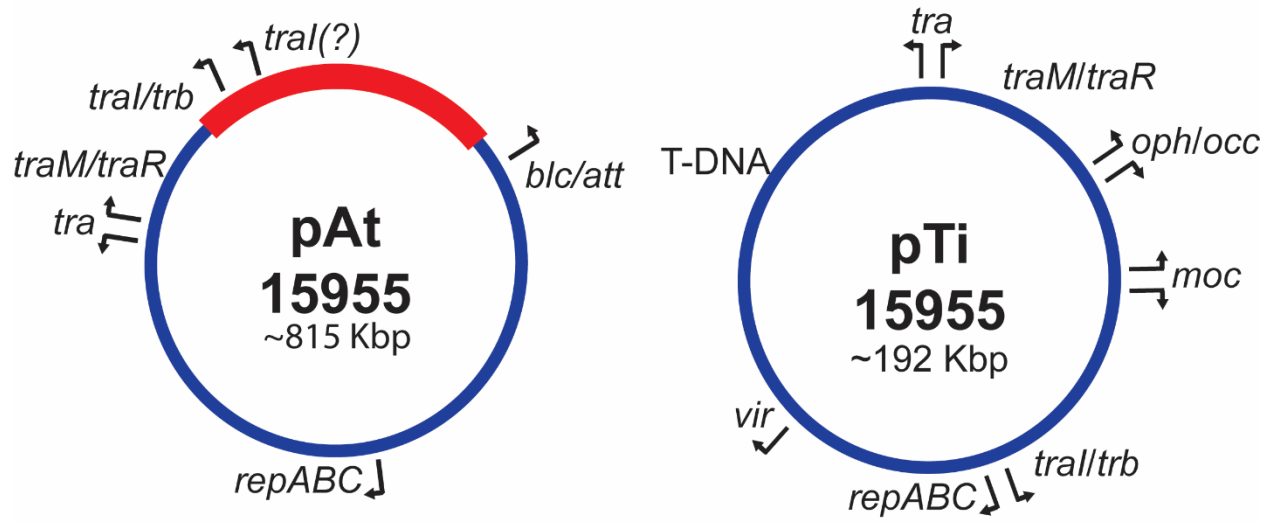

**Figure S6: Organization of select genes within pAt15955 and pTi15955.** Schematic showing placement of subset of operon locations within pAt15955 and pTi15955. The red segment in pAt15955 is the  $\Delta 270$  region

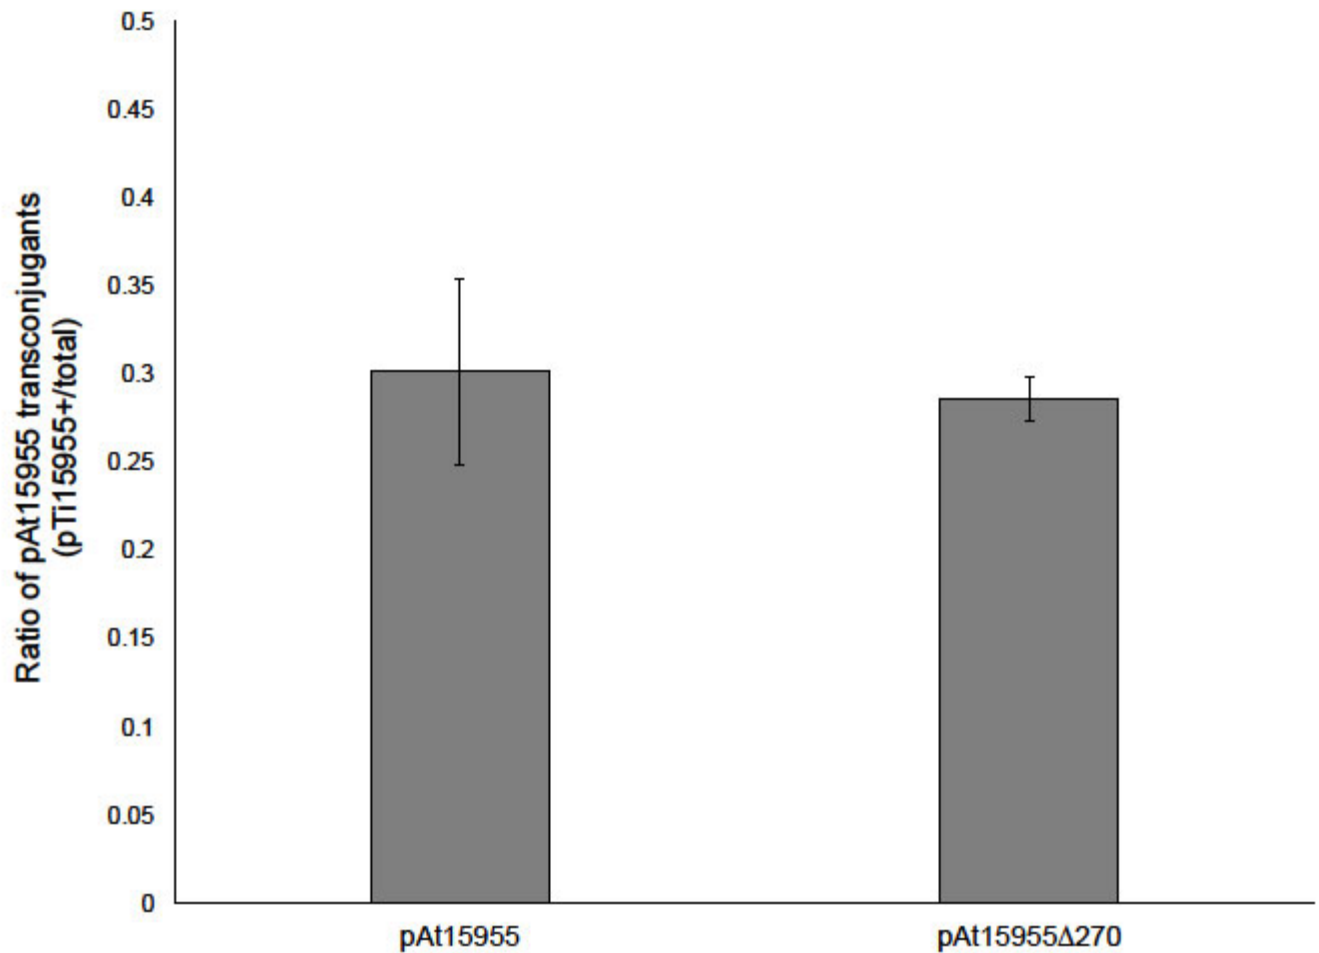

**Figure S7: pAt15955 segment does not affect At and Ti plasmid co-transfer.** Frequency of co-transfer between pAt15955 or pAt15955Δ270 and pTi15955 were determined by screening At plasmid transconjugants from IB125 or IB131 donor conjugations (Figure 4) for presence or absence of pTi15955 by octopine auxotrophy screening on ATO media (Methods). Co-transfer frequencies reported as the ratio of pTi15955 (+) to total transconjugants.



**Table S1: Strains used in this study**

| Strain/plasmid                     | Genotype/Markers                                                              | Notes                                                       | Reference                |
|------------------------------------|-------------------------------------------------------------------------------|-------------------------------------------------------------|--------------------------|
| <b><i>E. coli</i></b>              |                                                                               |                                                             |                          |
| DH5α/λpir                          | λpir ; cloning strain                                                         |                                                             | (Chiang et al. 2002)     |
| S17-1/λpir                         | λpir ; Tra <sup>+</sup> , cloning host                                        |                                                             | (Kalogeraki et al. 1997) |
| <b><i>A. tumefaciens</i> 15955</b> |                                                                               |                                                             |                          |
| WT                                 | pAt15955;<br>pTi15955                                                         |                                                             |                          |
| SA122                              | pAt15955Δ270                                                                  | Cured of pTi15955<br>via chemical<br>methods                | S.K. Farrand             |
| IBE13A                             | pAt15955Δ270;<br>pTi15955                                                     |                                                             | This study               |
| IB118                              | pAt15955::lacZ/Sp <sup>R</sup> ;<br>pTi15955::gusA/Gm <sup>R</sup>            |                                                             | This study               |
| IB119                              | Circ::Km <sup>R</sup>                                                         | Marked on circular<br>chromosome                            | This study               |
| IB120                              | Circ::Km <sup>R</sup> ;<br>pAt15955Δ270;<br>pTi15955                          | IBE13A marked on<br>circular<br>chromosome                  | This study               |
| IB123                              | pAt15955;<br>pTi15955::gusA/Gm <sup>R</sup>                                   |                                                             | This study               |
| IB118ΔIS66                         | pAt15955::lacZ/Sp <sup>R</sup> ;<br>pTi15955::gusA/Gm <sup>R</sup> ;<br>ΔIS66 | IB118 that has been<br>deleted flanking<br>IS66 on pAt15955 | This study               |
| IB124                              | pAt15955Δ270                                                                  | Cured of pTi15955<br>via incompatibility                    | This study               |
| IBJUN138                           | pAt15955                                                                      | pTi15955-cured<br>derivative with intact<br>pAt15955        | This study               |
| IB125                              | pAt15955::Km <sup>R</sup> ;<br>pTi15955                                       |                                                             | This study               |
| IB126                              | Circ::Sp <sup>R</sup> ;<br>pAt15955;<br>pTi15955::gusA/Gm <sup>R</sup>        | IB123 marked on<br>circular<br>chromosome                   | This study               |
| IB127                              | Circ::Sp <sup>R</sup> ;<br>pAt15955Δ270                                       | IB124 marked on<br>circular<br>chromosome                   | This study               |

|                     |                                                                                     |                                                                                                                                                   |            |
|---------------------|-------------------------------------------------------------------------------------|---------------------------------------------------------------------------------------------------------------------------------------------------|------------|
| IB128               | Circ::Sp <sup>R</sup> ;<br>pAt15955                                                 | IBJUN138 marked<br>on circular<br>chromosome                                                                                                      | This study |
| IB129               | Circ::Sp <sup>R</sup> ;<br>pAt15955 $\Delta$ 270;<br>pTi15955::gusA/Gm <sup>R</sup> | IB127 with pTi15955<br>reintroduced through<br>mating with IB123                                                                                  | This study |
| IB130               | Circ::Sp <sup>R</sup> ;<br>pAt15955;<br>pTi15955::gusA/Gm <sup>R</sup>              | IB128 with pTi15955<br>reintroduced through<br>mating with IB123                                                                                  | This study |
| IB118 <i>loxL</i>   | pAt15955/ <i>loxL</i> ::lacZ/Sp <sup>R</sup> ;<br>pTi15955::gus/Gm <sup>R</sup>     | IB118 with two <i>loxP</i><br>sites introduced<br>within left half ( <b>L</b> ) of<br>pAt15955 deletion<br>interval                               | This study |
| IB118 <i>loxR</i>   | pAt15955/ <i>loxR</i> ::lacZ/Sp <sup>R</sup> ;<br>pTi15955::gusA/Gm <sup>R</sup>    | IB118 with two <i>loxP</i><br>sites introduced<br>within right half ( <b>R</b> )<br>of pAt15955 deletion<br>interval                              | This study |
| IB118 <i>loxL+R</i> | pAt15955/ <i>loxL+R</i> ::lacZ/Sp <sup>R</sup> ;<br>pTi15955::gusA/Gm <sup>R</sup>  | IB118 with two <i>loxP</i><br>sites introduced<br>within pAt15955<br>deletion interval                                                            | This study |
| IB118 $\Delta$ L    | pAt15955 $\Delta$ L::lacZ/Sp <sup>R</sup> ;<br>pTi15955::gusA/Gm <sup>R</sup>       | IB118 <i>loxL</i> with<br>truncation of left half<br>of pAt15955<br>segment (~130Kbp)<br>via Cre                                                  | This study |
| IB118 $\Delta$ R    | pAt15955 $\Delta$ R::lacZ/Sp <sup>R</sup> ;<br>pTi15955::gusA/Gm <sup>R</sup>       | IB118 <i>loxR</i> with<br>truncation of right<br>half of pAt15955<br>segment (~130Kbp)<br>via Cre                                                 | This study |
| IB118 $\Delta$ L+R  | pAt15955 $\Delta$ L+R;<br>pTi15955::gusA/Gm <sup>R</sup>                            | IB118 <i>loxL+R</i> with<br>truncation of entire<br>pAt15955 segment<br>(~270Kbp) via Cre—<br>removing 1234 <i>lacZ</i><br>Sp <sup>R</sup> marker | This study |
| IB131               | pAt15955 $\Delta$ 270::Km <sup>R</sup><br>pTi15955                                  | IBE13A with Km <sup>R</sup><br>marker on<br>pAt15955, outside of<br>deletion interval                                                             | This study |

|       |                               |                                                                                |                      |
|-------|-------------------------------|--------------------------------------------------------------------------------|----------------------|
| IB132 | pAt15955Δ270::Km <sup>R</sup> | IB124 with Km <sup>R</sup> marker on pAt15955, outside of deletion interval    | This study           |
| IB133 | pAt15955::Km <sup>R</sup>     | IBJUN138 with Km <sup>R</sup> marker on pAt15955, outside of deletion interval | This study           |
| ERM52 | Circ::Sp <sup>R</sup>         | <i>A. tumefaciens</i> C58 derivative, Plasmidless Ti- Ai-                      | (Morton et al. 2014) |

**Table S2: Plasmids used in this study**

| Plasmid                                                | Features                                                                              | Reference                                                                  |
|--------------------------------------------------------|---------------------------------------------------------------------------------------|----------------------------------------------------------------------------|
| pSRKKm                                                 | Broad host range <i>Plac</i> expression vector; <i>lacI</i> Q; <i>Gm</i> <sup>R</sup> | (Khan et al. 2008)                                                         |
| pNPTS138                                               | ColE1 suicide plasmid; <i>sacB</i> ; <i>Km</i> <sup>R</sup>                           | Gift of M. Alley                                                           |
| pGEM T-Easy                                            | PCR cloning vector; <i>Ap</i> <sup>R</sup>                                            | Promega                                                                    |
| pCRE1-Ap                                               | Cre recombinase suicide vector                                                        | Gift from D. Rowe-Magnus; Bailey and Manoil, 2002, Nat. Biotech. 20:839-42 |
| pIB301                                                 | pTi15955 curing vector; <i>sacB</i> ; <i>Km</i> <sup>R</sup> ;                        | This study                                                                 |
| pAt15955:: <i>lacZ</i> /Sp <sup>R</sup>                | <i>plac</i> :: <i>lacZ</i> ; Sp <sup>R</sup> ; marked within deletion segment         | This study                                                                 |
| pAt15955:: <i>Km</i> <sup>R</sup>                      | <i>Km</i> <sup>R</sup> ; marked outside deletion segment                              | This study                                                                 |
| pAt15955/ <i>oxL</i> :: <i>lacZ</i> /Sp <sup>R</sup>   | Two <i>loxP</i> sites integrated into left ( <b>L</b> ) side of pAt15955 segment      | This study                                                                 |
| pAt15955/ <i>oxR</i> :: <i>lacZ</i> /Sp <sup>R</sup>   | Two <i>loxP</i> sites integrated into right ( <b>R</b> ) side of pAt15955 segment     | This study                                                                 |
| pAt15955/ <i>oxL+R</i> :: <i>lacZ</i> /Sp <sup>R</sup> | Two <i>loxP</i> sites integrated within pAt15955 segment, just inside flanking IS66   | This study                                                                 |
| pAt15955Δ <i>L</i> :: <i>lacZ</i> Sp <sup>R</sup>      | Cre-mediated deletion of left ( <b>L</b> ) side of pAt15955 segment                   | This study                                                                 |
| pAt15955Δ <i>R</i> :: <i>lacZ</i> Sp <sup>R</sup>      | Cre-mediated deletion of right ( <b>R</b> ) side of pAt15955 segment                  | This study                                                                 |
| pAt15955Δ <i>L+R</i>                                   | Cre-mediated deletion of entire pAt15955 segment                                      | This study                                                                 |
| pAt15955Δ270:: <i>Km</i> <sup>R</sup>                  | <i>Km</i> <sup>R</sup>                                                                | This study                                                                 |
| pTi15955:: <i>gusA</i> / <i>Gm</i> <sup>R</sup>        | <i>pLac</i> :: <i>gusA</i> ; <i>Gm</i> <sup>R</sup>                                   | This study                                                                 |

**Table S3: Primers used in this study\***

| <b>Primer</b> | <b>Sequence</b>                                                      | <b>Description</b>                                |
|---------------|----------------------------------------------------------------------|---------------------------------------------------|
| IBIP1         | TCACTCATTGGCGTCTCGTT                                                 | IS66 Inverse PCR                                  |
| IBIP2         | CGCCTATGCAAAGTGAAGCC                                                 | IS66 Inverse PCR                                  |
| IBP102        | GTGCAAAGGCACTCGTATCG                                                 | IS66 Inverse PCR/<br>Southern probe               |
| IBP103        | GGCGAACTTCTCGAACAGGA                                                 | IS66 Inverse PCR/<br>Southern probe               |
| IBP200        | TCCTGCAGCCCGGGGGTTGATCTCCGCAACAAGAAACGA                              | <i>repABC</i> NEBuild primer<br>for curing vector |
| IBP201        | ATGCCGATATGGTGGCCGAAGGCAT                                            | <i>repABC</i> NEBuild primer<br>for curing vector |
| IBP202        | GCCACCATATCGGCATTTTCTTTTGCGTTTTTATTTGTTAAC                           | <i>sacB</i> NEBuild primer for<br>curing vector   |
| IBP203        | CCGCTCTAGAACTAGTGCTATTATTTAGTGAAATGAGATATT<br>ATGATATTTTCTGAATTGTGAT | <i>sacB</i> NEBuild primer for<br>curing vector   |

\*All other primer sequences used in strain creation or diagnostics are available upon request.

## References

- Chiang, SL, Rubin, EJ (2002). Construction of a mariner-based transposon for epitope-tagging and genomic targeting. *Gene* 296: 7.
- Kalogeraki, VS, Winans, SC (1997). Suicide plasmids containing promoterless reporter genes can simultaneously disrupt and create fusions to target genes of diverse bacteria. *Gene* 188: 7.
- Khan, SR, Gaines, J, Roop, RM, 2nd, Farrand, SK (2008). Broad-host-range expression vectors with tightly regulated promoters and their use to examine the influence of TraR and TraM expression on Ti plasmid quorum sensing. *Applied and environmental microbiology* 74(16): 5053-5062.
- Morton, ER, Platt, TG, Fuqua, C, Bever, JD (2014). Non-additive costs and interactions alter the competitive dynamics of co-occurring ecologically distinct plasmids. *Proc Biol Sci* 281(1779): 20132173.
